# Supplementary material for: Aqueous radical addition-coupling polymerization using a nitroso benzene/cyclodextrin complex for the synthesis of a hydrophilic periodic polymer
Source: Royal Society of Chemistry journal article supplement (doi:10.1039/c5ra02371h), 2015-01-01
Supplement: c5ra02371h1.pdf [file c5ra02371h1.pdf]

## Supporting Information

# **Aqueous Radical Addition-Coupling Polymerization Using Nitroso Benzene/Cyclodextrin Complex for Synthesis of Hydrophilic Periodic Polymer**

**Fangqi Tao, and Qi Wang**

*Key Laboratory of Macromolecular Synthesis and Functionalization (Ministry of Education), Department of Polymer Science and Engineering, Zhejiang University, Hangzhou, 310027, P. R. China.; E-mail: wangq@zju.edu.cn.*

## 1. Figures of $^1\text{H}$ -NMR and GPC

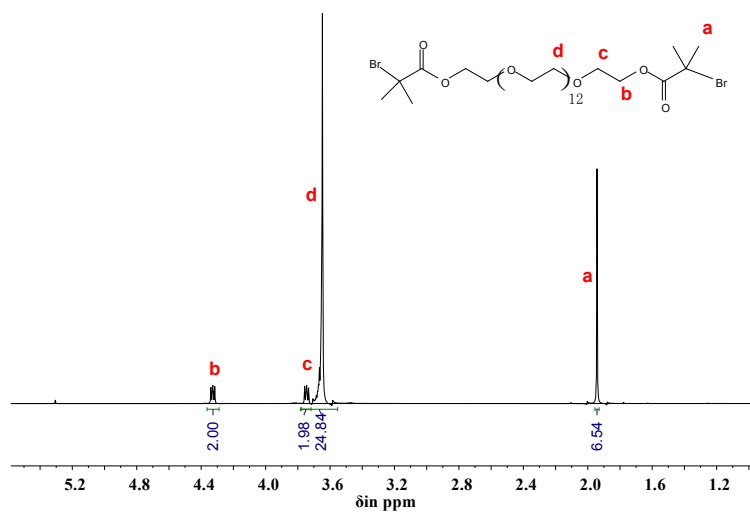

Fig.S1  $^1\text{H}$  NMR ( $\text{CDCl}_3$ , 400MHz) spectrum of Br-PEG-Br.

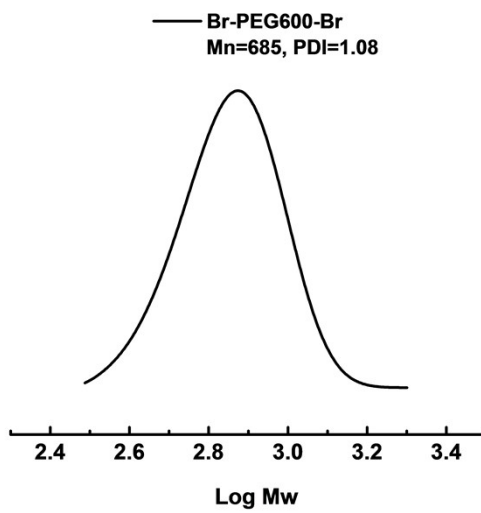

Fig. S2 GPC curve of Br-PEG-Br.

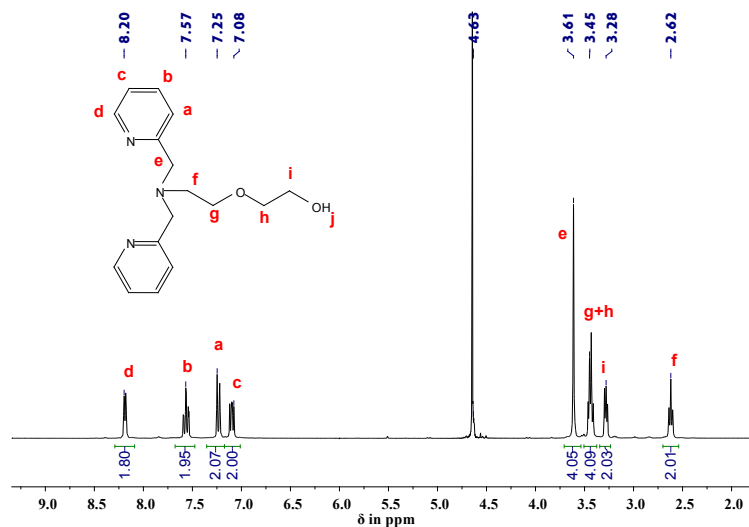

**Fig.S3** <sup>1</sup>H NMR (D<sub>2</sub>O, 400MHz) spectrum of N-(2-hydroxyethyl)- bis(2-picoly) amine (HEEBPA).

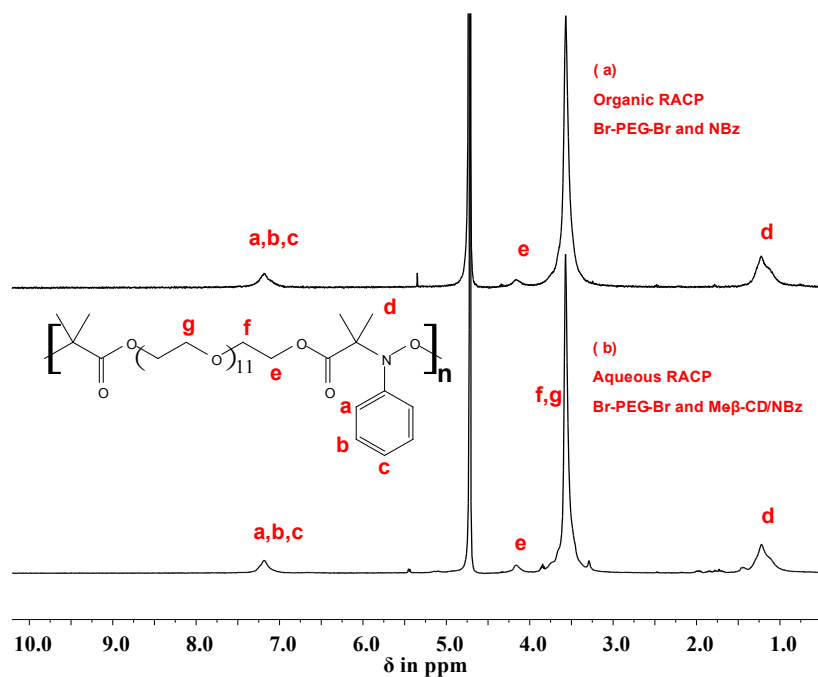

**Fig.S4** <sup>1</sup>H NMR (D<sub>2</sub>O, 400MHz) spectra of polymers prepared by RACP in water and organic solvent.
